# Supplementary material
Source: PubMed Central journal article supplement (PMC4896852)

# Supplementary Figure 1

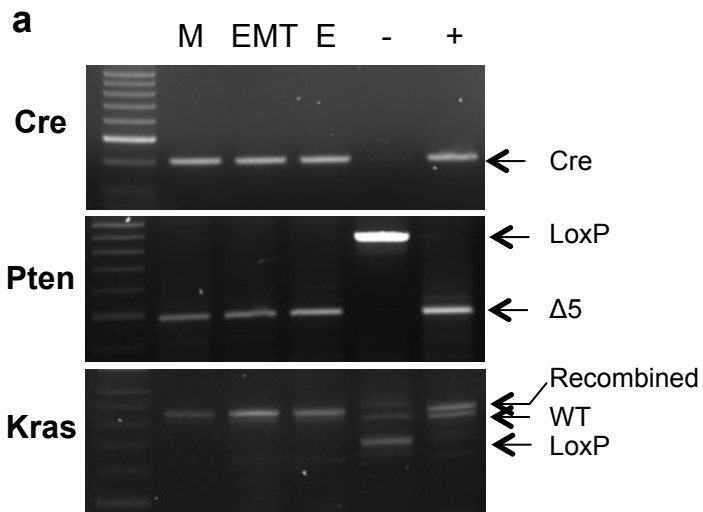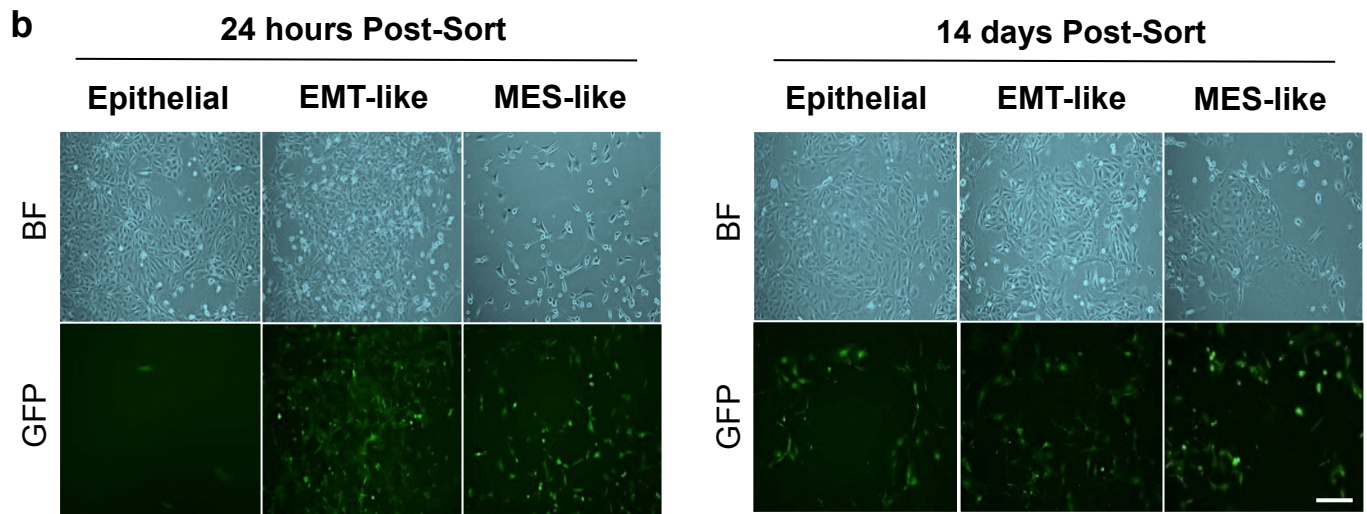

Supplement: NIHMS728572-supplement-2.pdf [file NIHMS728572-supplement-2.pdf]
